# Life expectancy and cancer survival in the EURO CARE-3 cancer registry areas

A. Micheli<sup>1\*</sup>, P. Baili<sup>1</sup>, M. Quinn<sup>2</sup>, E. Mugno<sup>1</sup>, R. Capocaccia<sup>3</sup>, P. Grosclaude<sup>4</sup> and the EURO CARE Working Group†

<sup>1</sup>Unit of Epidemiology, Istituto Nazionale per lo Studio e la Cura dei Tumori, Milan, Italy; <sup>2</sup>Office for National Statistics, London, UK; <sup>3</sup>Laboratory of Epidemiology and Biostatistics, Istituto Superiore di Sanità, Rome, Italy; <sup>4</sup>Registre des Cancers du Tarn, Tarn, France

**Background:** Mortality information is essential for estimating relative cancer survival (that excludes deaths from other causes). However, sufficiently detailed mortality data are not available for all areas covered by the cancer registries (CRs) participating in the EURO CARE-3 study.

**Materials and methods:** Mathematical methods were used to construct complete local mortality data (life tables) for each year of age (0–99), for each year (1978–2000) and by sex, from the incomplete life tables provided by CRs, presenting the results as life expectancy at birth (LE). Socio-economic data were obtained from the United Nations (UN) and Organisation for Economic Co-operation and Development (OECD).

**Results:** The time and regional trends in LE provided by our estimates are closely similar to those published by the UN at the country level. According to UN data, LE (men plus women) varied from 70 years in Estonia to almost 79 years in Sweden in the period 1995–1999. LE increased markedly over the 20-year study period in most countries except Estonia and Denmark. LE correlated directly with GDP, national expenditure on health and relative survival for all cancers combined. We found that within-country LE variation was large in some countries (particularly the UK). Sweden, Iceland, Switzerland, and parts of Spain and Italy had high LE; eastern European countries had low LE.

**Conclusions:** Detailed area-specific life tables are essential for reliable estimation of relative cancer survival and its comparison across populations, since LE varies markedly across Europe. Where not available, life tables can be constructed to the required level of detail using mathematical approaches.

**Key words:** cancer registries, cancer relative survival, Europe, life expectancy at birth

## Introduction

*Crude survival* from a cancer is the cumulative probability of survival in a group of patients with the cancer at a given time after diagnosis; it considers deaths due to the cancer plus all other causes. *Cause-specific survival* is an assessment of survival that considers mortality due to the cancer only. Cause-specific survival is estimated by linking cancer registration files with death information and considering only deaths due to cancer. However, in many countries such linking is not possible due to confidentiality constraints; and where it is possible it is resource intensive and is often problematic because cause-of-death information is not sufficiently accurate. *Relative survival* methods have therefore been developed which estimate the survival of cancer patients relative to the life expectancy of the population [1].

Relative survival is the ratio of the observed survival probability in a group of patients to the general population survival probability expected in a similar group in the absence of cancer. Since mortality

varies markedly with age, sex, over time and between populations [2], it is essential to account for all death risks not related to cancer in order to accurately estimate cancer relative survival and thereby render estimates comparable between different populations.

The EURO CARE project is a large-scale collaboration between European population-based cancer registries (CRs) whose purpose is to provide accurate estimates of the survival of cancer patients across Europe and to analyse and interpret survival differences [3]. In order to calculate relative survival, EURO CARE required general mortality data for all the populations covered by the participating CRs. All registries participating in EURO CARE-3 [3] were therefore asked to provide information on general mortality for their areas. The mortality data provided varied considerably in detail, and for many registry areas it was necessary to estimate general mortality rates from very limited data using mathematical interpolation and extrapolation procedures. The aim of these procedures was to produce ‘complete’ life tables for the populations covered, i.e. by each year of age (0–99), for men and for women, and for each year of the EURO CARE study period (1978–2000).

The first part of this article describes the general mortality data provided by the CRs, and the procedures used to calculate missing data for the different registry populations. The second part of this paper provides a general description of patterns and trends in life expectancy at birth (LE) (a measure directly derived from general

\*Correspondence to: Dr Andrea Micheli, Unit of Epidemiology, Istituto Nazionale per lo Studio e la Cura dei Tumori, Via Venezian 1, 20133 Milan, Italy. Tel: +39-02-23902867; Fax: +39-02-26681292; E-mail: micheli@istitutotumori.mi.it

†Members of the EURO CARE Group involved in the preparation of life tables are listed in the Acknowledgements.

**Table 1.** Truncated life table for men of the Province of Varese, Italy, 1995

| Age $x$ | $D_x$ | $P_x$ | $m_x$    | $q_x$    | $p_x$    | $l_x$  | $d_x$ | $L_x$    | $T_x$      | $e_x$              |
|---------|-------|-------|----------|----------|----------|--------|-------|----------|------------|--------------------|
| 0       | 13    | 3164  | 0.004109 | 0.004100 | 0.9959   | 100000 | 410   | 99794.99 | 7478626.59 | 74.79 <sup>a</sup> |
| 1       | 2     | 3549  | 0.000564 | 0.000563 | 0.999437 | 99590  | 56    | 99561.92 | 7378831.61 | 74.09              |
| 2       | 0     | 3642  | 0        | 0        | 1        | 99534  | 0     | 99533.86 | 7279269.69 | 73.13              |
| ⋮       | ⋮     | ⋮     | ⋮        | ⋮        | ⋮        | ⋮      | ⋮     | ⋮        | ⋮          | ⋮                  |
| 49      | 11    | 5559  | 0.001979 | 0.001977 | 0.998023 | 93730  | 185   | 93637.79 | 2691025.54 | 28.71              |
| 50      | 20    | 4861  | 0.004114 | 0.004106 | 0.995894 | 93545  | 384   | 93353.10 | 2597387.75 | 27.77              |
| 51      | 25    | 4982  | 0.005018 | 0.005005 | 0.994995 | 93161  | 466   | 92927.89 | 2504034.65 | 26.88              |
| ⋮       | ⋮     | ⋮     | ⋮        | ⋮        | ⋮        | ⋮      | ⋮     | ⋮        | ⋮          | ⋮                  |
| 98      | 7     | 11    | 0.636364 | 0.470787 | 0.529213 | 1092   | 514   | 835.26   | 1353.80    | 1.24               |
| 99      | 3     | 13    | 0.230769 | 0.206077 | 0.793923 | 578    | 119   | 518.55   | 518.55     | 0.90               |

$x$ , Year of age;  $D_x$ , deaths from all causes for men in the Province of Varese in 1995;  $P_x$ , mid-year population of men of the Province of Varese in 1995;  $m_x$ , age-specific death rate ( $m_x = D_x/P_x$ );  $q_x$ , probability of dying between exact ages  $x$  and  $x + 1$  ( $q_x = 1 - e^{-m_x}$ );  $p_x$ , probability of surviving between exact ages  $x$  and  $x + 1$  ( $p_x = 1 - q_x$ );  $l_x$ , number of people alive at exact age  $x$  (conventionally a life table is based on a cohort of 100 000 people alive at the beginning) ( $l_x = l_{x-1}p_x$  and  $l_0 = 100\ 000$ );  $d_x$ , number of people (in the original cohort of 100 000) dying between ages  $x$  and  $x + 1$  ( $d_x = l_x - l_{x+1}$ );  $L_x$ , number of person years lived between ages  $x$  and  $x + 1$  [ $L_x = (l_x + l_{x+1})/2$ ];  $T_x$ , total number of person-years lived after exact age  $x$ , i.e. the  $L_x$  column cumulated from the bottom ( $T_x = T_{x+1} + L_x$ );  $e_x$ , expectation of life at age  $x$ , i.e. the average number of years a person aged  $x$  has still to live ( $e_x = T_x/l_x$ ).

<sup>a</sup>Life expectancy at birth ( $e_0$ ).

mortality data) in Europe with an indication of the relationship between LE and gross domestic product (GDP). These patterns serve as general health indicators against which cancer survival patterns should be considered. We also present an analysis of relationships between LE and cancer survival using the new EURO CARE-3 cancer survival data. In studies carried out on earlier EURO CARE data, we identified an important relation between relative cancer survival and LE: countries with high relative cancer survival also had high LE, while countries with low relative survival had low LE [2, 4].

## Materials and methods

Mortality data, in the form of life tables, for all causes of death combined, were obtained from each participating CR. Table 1 shows an example of a CR life table. It refers to men in the Province of Varese, Italy, for 1995 and illustrates the relationship between mortality rates in the population ( $m_x$ ), age-specific probabilities of survival ( $p_x$ ) required for calculations of relative cancer survival and life expectancy at birth ( $e_0$ ).

Some CRs cover an entire country; others only parts of a country [3]. Table 2 summarises the characteristics of the general mortality data provided by each CR and the estimations carried out for the purposes of EURO CARE-3. For each CR, the table gives the following information: country; age interval; maximum age; period (years) covered by the life tables; period (years) for which estimates were performed; and the procedures used for obtaining the estimates. The main problems with the submitted data, and the solutions adopted to overcome the problems, are summarised here.

### Lack of data for some calendar years

We used the linear interpolation, or fraction method [2], to estimate the data for each missing year from data for the two nearest years. For example, if the death probabilities  $q_x$  at age  $x$  for the years 1979 and 1982 are known, the inter-

polated probabilities for the years 1980 and 1981 are given by

$$q_x(1980) = 2/3 q_x(1979) + 1/3 q_x(1982),$$

$$\text{and } q_x(1981) = 1/3 q_x(1979) + 2/3 q_x(1982).$$

If submitted data were grouped over several calendar years, the same method was used to estimate the death probability for each single year after first attributing the grouped data to the middle year of the interval. Missing data at either extreme of the study period (1978–2000) were taken to be those of the earliest and latest available life tables, respectively.

### Missing data for the oldest population segment

The *adult age* method proposed by Elandt-Johnson and Johnson [5] was used to estimate death probabilities for very old people, when these were not available. This method assumes that mortality in old age follows the Gompertz distribution [5]. We calculated death probabilities up to 99 years of age. Although this approach is sufficiently accurate for estimating relative survival in the elderly, mortality rates calculated for the very oldest ages by this method have to be interpreted with particular caution.

### Estimating complete life tables (single year age intervals) from 5-year age intervals

The *Elandt-Johnson* method [5] was used to obtain complete life tables from abridged life tables. This method is based on polynomial interpolations and employs different coefficients for children (0–9 years of age), and young people plus adults (10–74 years of age). The method assumes a Gompertz distribution [5] for ages  $\geq 75$  years.

### Regional life tables available for a single (census) calendar year only

This was a problem with French CRs. Life tables for the registration area were available only for 1990, while complete life tables (for each calendar year) were only available on a national basis. In this case, the *Adaptive* method [6–7] was used for the period 1978–1995. This method, proposed by Ewbank [6], is

**Table 2.** Characteristics of submitted and estimated general mortality by registry

| Registry                 | Country | Mortality data submitted |                    |                                                                                        | Data estimated by EURO CARE-3 |                |
|--------------------------|---------|--------------------------|--------------------|----------------------------------------------------------------------------------------|-------------------------------|----------------|
|                          |         | Age interval, years      | Maximum age, years | Period <sup>a</sup>                                                                    | Period <sup>a</sup>           | Method         |
| Amsterdam <sup>b</sup>   | NL      | 1                        | 99                 | 1978..2000                                                                             |                               |                |
| Basel                    | CH      | 5                        | 99                 | 1981..1998                                                                             | 1978..1980                    | Fraction       |
|                          |         |                          |                    |                                                                                        | 1981..1998                    | Elandt-Johnson |
|                          |         |                          |                    |                                                                                        | 1999..2000                    | Fraction       |
| Pays Basque              | E       | 1                        | 100                | 1975–1976                                                                              | 1978..1980                    | Fraction       |
|                          |         |                          |                    | 1980–1981                                                                              | 1982..1985                    | Fraction       |
|                          |         |                          |                    | 1985–1986                                                                              | 1987..1990                    | Fraction       |
|                          |         |                          |                    | 1990–1991                                                                              | 1992..1995                    | Fraction       |
|                          |         |                          |                    | 1995–1996                                                                              | 1997..2000                    | Fraction       |
| Bas Rhin                 | F       | 1                        | 98                 | 1986..1994                                                                             | 1978..1985                    | Adaptive       |
|                          |         |                          |                    |                                                                                        | 1995..2000                    | Fraction       |
| Calvados                 | F       | 1                        | 98                 | 1986..1994                                                                             | 1978..1985                    | Adaptive       |
|                          |         |                          |                    |                                                                                        | 1995..2000                    | Fraction       |
| Côte d'Or                | F       | 1                        | 98                 | 1986..1994                                                                             | 1978..1985                    | Adaptive       |
|                          |         |                          |                    |                                                                                        | 1995..2000                    | Fraction       |
| Cracow                   | PL      | 1                        | 100                | 1982..1996                                                                             | 1978..1981                    | Elandt-Johnson |
|                          |         |                          |                    |                                                                                        | 1982..1996                    | Exponential    |
|                          |         |                          |                    |                                                                                        | 1997..2000                    | Fraction       |
| Denmark <sup>c</sup>     | DK      | 1                        | 99                 | 1978..1999                                                                             | 1978..1999                    | Exponential    |
|                          |         |                          |                    |                                                                                        | 2000                          | Fraction       |
| East Anglia <sup>d</sup> | UK      | 1                        | 99                 | 1971–1985, 1985–1995                                                                   | 1978..1995                    | Fraction       |
|                          |         | 5                        | 85                 | 1996..1999                                                                             | 1996..1999                    | Elandt-Johnson |
|                          |         |                          |                    |                                                                                        | 2000                          | Fraction       |
| Eindhoven                | NL      | 1                        | 99                 | 1976–1978, 1979–1981, 1982–1984, 1985–1987, 1988–1990, 1991–1993, 1994–1996, 1997–1999 | 1978..2000                    | Fraction       |
|                          |         |                          |                    |                                                                                        |                               |                |
| Estonia <sup>e</sup>     | EST     | 1                        | 110                | 1978..1999                                                                             | 2000                          | Fraction       |
| Ferrara                  | I       | 1                        | 99                 | 1978..1997                                                                             | 1978..1997                    | Exponential    |
|                          |         |                          |                    |                                                                                        | 1998..2000                    | Fraction       |
| Finland                  | FIN     | 1                        | 99                 | 1976–1980, 1981–1985, 1986–1990, 1991–1995, 1996–1999                                  | 1978..2000                    | Fraction       |
|                          |         |                          |                    |                                                                                        |                               |                |
| Geneva                   | CH      | 5                        | 99                 | 1978..1999                                                                             | 1978..1999                    | Elandt-Johnson |
|                          |         |                          |                    |                                                                                        | 2000                          | Fraction       |
| Genoa                    | I       | 1                        | 99                 | 1990..1999                                                                             | 1978..1989                    |                |
|                          |         |                          |                    |                                                                                        | 2000                          | Fraction       |
| Granada                  | E       | 1                        | 99                 | 1978..1998                                                                             | 1978..1998                    | Exponential    |
|                          |         |                          |                    |                                                                                        | 1999..2000                    | Fraction       |
| Iceland <sup>e</sup>     | ICE     | 1                        | 99                 | 1995..1999                                                                             | 1978..1994                    |                |
|                          |         |                          |                    |                                                                                        | 2000                          | Fraction       |
| Isère                    | F       | 1                        | 98                 | 1986..1994                                                                             | 1978..1985                    | Adaptive       |
|                          |         |                          |                    |                                                                                        | 1995..2000                    | Fraction       |
| Latina                   | I       | 1                        | 99                 | 1978..1997                                                                             | 1978..1997                    | Exponential    |
|                          |         |                          |                    |                                                                                        | 1998..2000                    | Fraction       |
| Macerata                 | I       | 1                        | 99                 | 1978..1997                                                                             | 1978..1997                    | Exponential    |
|                          |         |                          |                    |                                                                                        | 1998..2000                    | Fraction       |

Table 2. (Continued)

| Registry              | Country | Mortality data submitted |                         |                       | Data estimated by EUROCARE-3 |                              |
|-----------------------|---------|--------------------------|-------------------------|-----------------------|------------------------------|------------------------------|
|                       |         | Age interval, years      | Maximum age, years      | Period <sup>a</sup>   | Period <sup>a</sup>          | Method                       |
| Mallorca              | E       | 1                        | 90                      | 1994..1996            | 1978..1993                   | Fraction                     |
|                       |         |                          |                         |                       | 1994..1996                   | Adult age                    |
|                       |         |                          |                         |                       | 1997..2000                   | Fraction                     |
| Malta <sup>c</sup>    | MLT     | 1                        | 85                      | 1978..1997            | 1978..1997                   | Adult age and exponential    |
|                       |         |                          |                         |                       | 1998..2000                   | Fraction                     |
| Mersey <sup>e</sup>   | UK      | 1                        | 99                      | 1971–1985, 1985–1995  | 1978..1995                   | Fraction                     |
|                       |         | 5                        | 85                      | 1996..1999            | 1996..1999                   | Elandt-Johnson               |
| Modena                | I       | 1                        | 99                      | 1978..1997            | 1978..1997                   | Exponential                  |
|                       |         |                          |                         |                       | 1998..2000                   | Fraction                     |
|                       |         |                          |                         |                       | 2000                         | Fraction                     |
| Munich <sup>f</sup>   | D       | 1                        | 90                      | 1980..1997            | 1978..1979                   | Fraction                     |
|                       |         |                          |                         |                       | 1980..1997                   | Adult age                    |
|                       |         |                          |                         |                       |                              | Fraction                     |
| Murcia <sup>g</sup>   | E       | 5                        | 75                      | 1989..1998            | 1989..1998                   | Elandt-Johnson and adult age |
|                       |         |                          |                         |                       | 1999..2000                   | Fraction                     |
| Navarra               | E       | 1                        | 99                      | 1978..1999            | 1978..1999                   | Exponential                  |
|                       |         |                          |                         |                       | 2000                         | Fraction                     |
| Norway <sup>c</sup>   | N       | 1                        | 99                      | 1953..1997            | 1998..2000                   | Fraction                     |
| Oxford <sup>d</sup>   | UK      | 1                        | 99                      | 1971–1985, 1985–1995  | 1978..1995                   | Fraction                     |
|                       |         | 5                        | 85                      | 1996..1999            | 1996..1999                   | Elandt-Johnson               |
| Parma                 | I       | 1                        | 99                      | 1978..1997            | 1978..1997                   | Exponential                  |
|                       |         |                          |                         |                       | 1998..2000                   | Fraction                     |
|                       |         |                          |                         |                       | 2000                         | Fraction                     |
| Portugal <sup>h</sup> | P       | 1                        | 99                      | 1991, 1996            | 1992..1995                   | Fraction                     |
|                       |         |                          |                         |                       | 1997..2000                   | Fraction                     |
| Ragusa                | I       | 1                        | 99                      | 1978..1997            | 1978..1997                   | Exponential                  |
|                       |         |                          |                         |                       | 1998..2000                   | Fraction                     |
| Romagna               | I       | 1                        | 99                      | 1978..1997            | 1978..1997                   | Exponential                  |
|                       |         |                          |                         |                       | 1998..2000                   | Fraction                     |
| Saarland              | D       | 1                        | Deaths: 99<br>Popul: 85 | 1978..1997            | 1978..1997                   | Exponential                  |
|                       |         |                          |                         |                       | 1998..2000                   | Fraction                     |
| Sassari               | I       | 1                        | 99                      | 1978..1997            | 1978..1997                   | Exponential                  |
|                       |         |                          |                         |                       | 1998..2000                   | Fraction                     |
| Scotland <sup>c</sup> | UK      | 1                        | 90                      | 1995..1999            | 1978..1994                   |                              |
|                       |         |                          |                         |                       | 1995..1999                   | Adult age                    |
| Slovakia <sup>c</sup> | SK      | 1                        | 99                      | 1992..1998            | 2000                         | Fraction                     |
|                       |         |                          |                         |                       | 1978..1991                   |                              |
|                       |         |                          |                         |                       | 1999..2000                   | Fraction                     |
| Slovenia <sup>c</sup> | SLO     | 5                        | 85                      | 1990–1992, 1992–1993, | 1978..1989                   |                              |
|                       |         | 1                        | 101                     | 1993–1994, 1993–1995, | 1990..1998                   | Elandt-Johnson               |
|                       |         |                          |                         | 1995–1996, 1996–1997, | 1999..2000                   | Fraction                     |
| South West            | UK      | 1                        | 99                      | 1971–1985, 1985–1995  | 1978..1995                   | Fraction                     |
|                       |         | 5                        | 85                      | 1996..1999            | 1996..1999                   | Elandt-Johnson               |
|                       |         |                          |                         |                       | 2000                         | Fraction                     |

**Table 2.** (Continued)

| Registry                  | Country | Mortality data submitted |                    |                      | Data estimated by EUROCARE-3 |                |                |            |          |
|---------------------------|---------|--------------------------|--------------------|----------------------|------------------------------|----------------|----------------|------------|----------|
|                           |         | Age interval, years      | Maximum age, years | Period <sup>a</sup>  | Period <sup>a</sup>          | Method         |                |            |          |
| Sweden <sup>c</sup>       | S       | 1                        | 99                 | 1958..1999           | 2000                         | Fraction       |                |            |          |
| Tarragona <sup>i</sup>    | E       | 5                        | 95                 | 1985..1997           | 1985..1997                   | Elandt-Johnson |                |            |          |
|                           |         |                          |                    |                      | 1998..2000                   | Fraction       |                |            |          |
| Thames <sup>j</sup>       | UK      | 1                        | 99                 | 1971–1985, 1985–1995 | 1978..1995                   | Fraction       |                |            |          |
|                           |         | 5                        | 85                 | 1996..1999           | 1996..1999                   | Elandt-Johnson |                |            |          |
| Trent                     | UK      | 1                        | 99                 | 1971–1985            | 2000                         | Fraction       |                |            |          |
|                           |         |                          |                    |                      | 5                            | 85             | 1985–1995      | 1978..1995 | Fraction |
|                           |         |                          |                    |                      | 1996..1999                   | 1996..1999     | Elandt-Johnson |            |          |
| Turin                     | I       | 1                        | 99                 | 1978..1997           | 2000                         | Fraction       |                |            |          |
|                           |         |                          |                    |                      | 1978..1997                   | Exponential    |                |            |          |
| Tuscany <sup>k</sup>      | I       | 1                        | 99                 | 1978..1997           | 1998..2000                   | Fraction       |                |            |          |
|                           |         |                          |                    |                      | 1978..1997                   | Exponential    |                |            |          |
| Tyrol                     | A       | 5                        | 90                 | 1991..1999           | 1998..2000                   | Fraction       |                |            |          |
|                           |         |                          |                    |                      | 1978..1990                   |                |                |            |          |
|                           |         |                          |                    |                      | 1991..1999                   | Elandt-Johnson |                |            |          |
| Varese                    | I       | 1                        | 99                 | 1978..1997           | 2000                         | Fraction       |                |            |          |
|                           |         |                          |                    |                      | 1978..1997                   | Exponential    |                |            |          |
| Veneto                    | I       | 1                        | 99                 | 1978..1997           | 1998..2000                   | Fraction       |                |            |          |
|                           |         |                          |                    |                      | 1978..1997                   | Exponential    |                |            |          |
| Wales <sup>c</sup>        | UK      | 1                        | 99                 | 1971–1985, 1985–1995 | 1978..1995                   | Fraction       |                |            |          |
|                           |         | 5                        | 85                 | 1996..1999           | 1996..1999                   | Elandt-Johnson |                |            |          |
| Warsaw                    | PL      | 1                        | 100                | 1986..2001           | 2000                         | Fraction       |                |            |          |
|                           |         |                          |                    |                      | 1978..1985                   | Elandt-Johnson |                |            |          |
| West Bohemia <sup>l</sup> | CZ      | 5                        | 85                 | 1978..1994           | 1986..1997                   | Exponential    |                |            |          |
|                           |         |                          |                    |                      | 1978..1994                   | Elandt-Johnson |                |            |          |
| West Midlands             | UK      | 1                        | 99                 | 1971–1985, 1985–1995 | 1995..2000                   | Fraction       |                |            |          |
|                           |         | 5                        | 85                 | 1996..1999           | 1978..1995                   | Fraction       |                |            |          |
| Yorkshire                 | UK      | 1                        | 99                 | 1971–1985, 1985–1995 | 1996..1999                   | Elandt-Johnson |                |            |          |
|                           |         |                          |                    |                      | 5                            | 85             | 1996..1999     | 2000       | Fraction |
|                           |         |                          |                    |                      | 1996..1999                   | 1978..1995     | Fraction       |            |          |
|                           |         |                          |                    |                      | 2000                         | Fraction       |                |            |          |

<sup>a</sup>'y1..y2' means every year from y1 to y2 inclusive; 'y1–y2' means that a single set of data for the period y1–y2 was submitted.

<sup>b</sup>Life tables for the Netherlands used.

<sup>c</sup>National cancer registry (covering entire country).

<sup>d</sup>East Anglia and Oxford (UK) have the same life tables.

<sup>e</sup>Life tables of North Western (UK) used.

<sup>f</sup>Life tables for Germany used.

<sup>g</sup>Life tables start from 1989.

<sup>h</sup>Life tables start from 1991.

<sup>i</sup>Life tables start from 1985.

<sup>j</sup>Life tables for South-Thames (UK) used.

<sup>k</sup>Life tables for Florence (I) used.

<sup>l</sup>Life table data up to 1994, while life expectancy at birth information is up to 1999.

A, Austria; CZ, Czech Republic; DK, Denmark; UK for England, Scotland and Wales; EST, Estonia; FIN, Finland; F, France; D, Germany; ICE, Iceland; I, Italy; MLT, Malta; NL, Netherlands; N, Norway; P, Portugal; PL, Poland; SK, Slovakia; SLO, Slovenia; E, Spain; S, Sweden; CH, Switzerland.

**Table 3.** Life expectancy at birth for men in EUROCARE-3 cancer registry areas

| Cancer registry        | Country | Life expectancy at birth, years |       |       | Rank (increasing order) |      |      | Quartile |      |      |
|------------------------|---------|---------------------------------|-------|-------|-------------------------|------|------|----------|------|------|
|                        |         | 1978                            | 1987  | 1997  | 1978                    | 1987 | 1997 | 1978     | 1987 | 1997 |
| Estonia                | EST     | 64.59                           | 66.37 | 64.69 | 1                       | 1    | 1    | 1        | 1    | 1    |
| Slovakia               | SK      | 66.99                           | 67.12 | 68.80 | 3                       | 2    | 2    | 1        | 1    | 1    |
| West Bohemia           | CZ      | 66.53                           | 67.37 | 70.04 | 2                       | 3    | 3    | 1        | 1    | 1    |
| Warsaw                 | PL      | 67.70                           | 68.21 | 70.43 | 6                       | 4    | 4    | 1        | 1    | 1    |
| Cracow                 | PL      | 67.70                           | 68.24 | 70.74 | 6                       | 5    | 5    | 1        | 1    | 1    |
| Slovenia               | SLO     | 67.52                           | 68.58 | 71.09 | 5                       | 6    | 6    | 1        | 1    | 1    |
| Portugal <sup>a</sup>  | P       | –                               | –     | 71.54 | –                       | –    | 7    | –        | –    | 1    |
| Scotland               | UK      | 67.94                           | 70.47 | 72.53 | 9                       | 8    | 8    | 1        | 1    | 1    |
| Finland                | FIN     | 68.45                           | 70.59 | 73.15 | 10                      | 9    | 9    | 1        | 1    | 1    |
| Saarland               | D       | 67.42                           | 70.87 | 73.31 | 4                       | 10   | 10   | 1        | 1    | 1    |
| Mersey                 | UK      | 69.69                           | 71.55 | 73.39 | 16                      | 13   | 11   | 2        | 1    | 1    |
| Denmark                | DK      | 71.40                           | 71.84 | 73.51 | 35                      | 15   | 12   | 3        | 2    | 1    |
| Bas Rhin               | F       | 69.55                           | 71.19 | 73.63 | 14                      | 11   | 13   | 2        | 1    | 1    |
| Calvados               | F       | 69.73                           | 71.36 | 73.86 | 17                      | 12   | 14   | 2        | 1    | 2    |
| Yorkshire              | UK      | 70.00                           | 71.83 | 74.14 | 20                      | 14   | 15   | 2        | 1    | 2    |
| Mallorca               | E       | 69.47                           | 72.07 | 74.15 | 13                      | 16   | 16   | 1        | 2    | 2    |
| Granada                | E       | 71.12                           | 72.93 | 74.16 | 30                      | 33   | 17   | 3        | 3    | 2    |
| Basque Country         | E       | 70.13                           | 72.44 | 74.16 | 21                      | 21   | 18   | 2        | 2    | 2    |
| Wales                  | UK      | 70.32                           | 72.40 | 74.20 | 23                      | 19   | 19   | 2        | 2    | 2    |
| Munich                 | D       | 69.99                           | 72.07 | 74.25 | 19                      | 17   | 20   | 2        | 2    | 2    |
| Eindhoven              | NL      | 71.20                           | 72.79 | 74.30 | 32                      | 29   | 21   | 3        | 3    | 2    |
| West Midlands          | UK      | 70.47                           | 72.36 | 74.49 | 25                      | 18   | 22   | 2        | 2    | 2    |
| Ferrara                | I       | 70.20                           | 72.48 | 74.49 | 22                      | 22   | 23   | 2        | 2    | 2    |
| Murcia <sup>b</sup>    | E       | –                               | –     | 74.50 | –                       | –    | 24   | –        | –    | 2    |
| Trent                  | UK      | 70.75                           | 72.61 | 74.78 | 28                      | 23   | 25   | 3        | 2    | 2    |
| Malta                  | MLT     | 68.76                           | 72.70 | 74.87 | 11                      | 26   | 26   | 1        | 2    | 2    |
| Genoa                  | I       | 70.74                           | 72.78 | 75.02 | 27                      | 27   | 27   | 3        | 2    | 3    |
| Isère                  | F       | 71.16                           | 72.78 | 75.21 | 31                      | 28   | 28   | 3        | 3    | 3    |
| Varese                 | I       | 69.94                           | 72.70 | 75.34 | 18                      | 25   | 29   | 2        | 2    | 3    |
| Côte d'Or              | F       | 71.28                           | 72.88 | 75.38 | 33                      | 30   | 30   | 3        | 3    | 3    |
| Norway                 | N       | 72.28                           | 72.91 | 75.43 | 44                      | 32   | 31   | 4        | 3    | 3    |
| Veneto                 | I       | 69.33                           | 72.43 | 75.46 | 12                      | 20   | 32   | 1        | 2    | 3    |
| Sassari                | I       | 71.38                           | 73.36 | 75.46 | 34                      | 36   | 33   | 3        | 3    | 3    |
| Amsterdam              | NL      | 72.60                           | 73.91 | 75.50 | 48                      | 41   | 34   | 4        | 4    | 3    |
| Parma                  | I       | 70.73                           | 72.91 | 75.55 | 26                      | 31   | 35   | 2        | 3    | 3    |
| Tyrol                  | A       | 72.20                           | 74.32 | 75.55 | 40                      | 43   | 36   | 4        | 4    | 3    |
| Thames                 | UK      | 71.79                           | 73.55 | 75.65 | 38                      | 38   | 37   | 3        | 3    | 3    |
| Latina                 | I       | 71.48                           | 73.47 | 75.70 | 37                      | 37   | 38   | 3        | 3    | 3    |
| Modena                 | I       | 71.05                           | 73.34 | 75.74 | 29                      | 35   | 39   | 3        | 3    | 3    |
| Turin                  | I       | 69.64                           | 72.95 | 75.79 | 15                      | 34   | 40   | 2        | 3    | 4    |
| Navarra                | E       | 71.46                           | 74.48 | 75.95 | 36                      | 45   | 41   | 3        | 4    | 4    |
| South West             | UK      | 71.98                           | 73.90 | 76.08 | 39                      | 40   | 42   | 4        | 4    | 4    |
| Ragusa                 | I       | 72.63                           | 74.62 | 76.20 | 49                      | 49   | 43   | 4        | 4    | 4    |
| Iceland                | ICE     | 73.22                           | 74.92 | 76.28 | 52                      | 52   | 44   | 4        | 4    | 4    |
| East Anglia            | UK      | 72.26                           | 74.06 | 76.35 | 42                      | 42   | 45   | 4        | 4    | 4    |
| Basel                  | CH      | 73.02                           | 73.85 | 76.36 | 51                      | 39   | 46   | 4        | 3    | 4    |
| Tarragona <sup>c</sup> | E       | –                               | 74.85 | 76.54 | –                       | 51   | 47   | –        | 4    | 4    |
| Romagna                | I       | 72.24                           | 74.41 | 76.66 | 41                      | 44   | 48   | 4        | 4    | 4    |
| Tuscany                | I       | 72.35                           | 74.57 | 77.06 | 45                      | 46   | 49   | 4        | 4    | 4    |
| Geneva                 | CH      | 72.56                           | 74.69 | 77.07 | 46                      | 50   | 50   | 4        | 4    | 4    |
| Macerata               | I       | 72.28                           | 74.59 | 77.07 | 43                      | 48   | 51   | 4        | 4    | 4    |
| Sweden                 | S       | 72.97                           | 74.59 | 77.19 | 50                      | 47   | 52   | 4        | 4    | 4    |

<sup>a</sup>Mortality data not available before 1991. In 1978 and 1987 we assumed that the Portuguese CR areas had the same rank as in 1997.

<sup>b</sup>Mortality data not available before 1989. In 1978 and 1987 we assumed that the Murcia CR area had the same rank as in 1997.

<sup>c</sup>Mortality data not available before 1985. In 1978 we assumed that Tarragona CR area had the same rank as in 1997.

A, Austria; CZ, Czech Republic; DK, Denmark; UK for England, Scotland and Wales; EST, Estonia; FIN, Finland; F, France; D, Germany; ICE, Iceland; I, Italy; MLT, Malta; NL, Netherlands; N, Norway; P, Portugal; PL, Poland; SK, Slovakia; SLO, Slovenia; E, Spain; S, Sweden; CH, Switzerland.

**Table 4.** Life expectancy at birth for women in EUROCare-3 cancer registry areas

| Cancer registry        | Country | Life expectancy at birth, years |       |       | Rank (increasing order) |      |      | Quartile |      |      |
|------------------------|---------|---------------------------------|-------|-------|-------------------------|------|------|----------|------|------|
|                        |         | 1978                            | 1987  | 1997  | 1978                    | 1987 | 1997 | 1978     | 1987 | 1997 |
| Estonia                | EST     | 74.50                           | 75.12 | 75.97 | 4                       | 2    | 1    | 1        | 1    | 1    |
| West Bohemia           | CZ      | 73.50                           | 74.46 | 76.63 | 2                       | 1    | 2    | 1        | 1    | 1    |
| Slovakia               | SK      | 74.73                           | 75.50 | 76.75 | 5                       | 3    | 3    | 1        | 1    | 1    |
| Cracow                 | PL      | 75.24                           | 75.64 | 77.25 | 8                       | 4    | 4    | 1        | 1    | 1    |
| Warsaw                 | PL      | 75.24                           | 75.85 | 77.71 | 8                       | 5    | 5    | 1        | 1    | 1    |
| Scotland               | UK      | 74.02                           | 76.51 | 77.90 | 3                       | 7    | 6    | 1        | 1    | 1    |
| Denmark                | DK      | 77.40                           | 77.63 | 78.51 | 25                      | 12   | 7    | 2        | 1    | 1    |
| Mersey                 | UK      | 75.58                           | 77.04 | 78.62 | 11                      | 9    | 8    | 1        | 1    | 1    |
| Slovenia               | SLO     | 75.06                           | 76.41 | 78.74 | 7                       | 6    | 9    | 1        | 1    | 1    |
| Portugal <sup>a</sup>  | P       | –                               | –     | 78.79 | –                       | –    | 10   | –        | –    | 1    |
| Yorkshire              | UK      | 75.80                           | 77.22 | 79.13 | 12                      | 11   | 11   | 1        | 1    | 1    |
| Wales                  | UK      | 75.95                           | 77.88 | 79.33 | 13                      | 15   | 12   | 1        | 2    | 1    |
| Saarland               | D       | 74.74                           | 77.85 | 79.43 | 6                       | 14   | 13   | 1        | 1    | 1    |
| Trent                  | UK      | 76.50                           | 77.92 | 79.47 | 18                      | 16   | 14   | 2        | 2    | 2    |
| Malta                  | MLT     | 73.04                           | 76.92 | 79.52 | 1                       | 8    | 15   | 1        | 1    | 2    |
| West Midlands          | UK      | 76.31                           | 77.74 | 79.59 | 14                      | 13   | 16   | 2        | 1    | 2    |
| Eindhoven              | NL      | 77.70                           | 79.03 | 80.08 | 35                      | 24   | 17   | 3        | 2    | 2    |
| Thames                 | UK      | 77.49                           | 78.90 | 80.20 | 29                      | 20   | 18   | 3        | 2    | 2    |
| Munich                 | D       | 76.63                           | 78.54 | 80.31 | 19                      | 18   | 19   | 2        | 2    | 2    |
| East Anglia            | UK      | 77.60                           | 78.93 | 80.39 | 32                      | 21   | 20   | 3        | 2    | 2    |
| Finland                | FIN     | 77.23                           | 78.69 | 80.49 | 21                      | 19   | 21   | 2        | 2    | 2    |
| South West             | UK      | 77.53                           | 79.12 | 80.61 | 31                      | 25   | 22   | 3        | 2    | 2    |
| Murcia <sup>b</sup>    | E       | –                               | –     | 80.67 | –                       | –    | 23   | –        | –    | 2    |
| Granada                | E       | 76.81                           | 78.96 | 80.77 | 20                      | 22   | 24   | 2        | 2    | 2    |
| Ragusa                 | I       | 76.42                           | 78.24 | 80.93 | 17                      | 17   | 25   | 2        | 2    | 2    |
| Norway                 | N       | 78.68                           | 79.60 | 80.98 | 42                      | 29   | 26   | 4        | 3    | 2    |
| Amsterdam              | NL      | 79.10                           | 80.42 | 80.99 | 49                      | 41   | 27   | 4        | 4    | 3    |
| Bas Rhin               | F       | 77.34                           | 79.37 | 81.36 | 22                      | 27   | 28   | 2        | 2    | 3    |
| Tyrol                  | A       | 78.27                           | 81.02 | 81.36 | 40                      | 51   | 29   | 4        | 4    | 3    |
| Iceland                | ICE     | 79.09                           | 79.88 | 81.43 | 48                      | 35   | 30   | 4        | 3    | 3    |
| Genoa                  | I       | 77.35                           | 79.64 | 81.84 | 24                      | 30   | 31   | 2        | 3    | 3    |
| Ferrara                | I       | 77.47                           | 79.79 | 81.86 | 27                      | 34   | 32   | 3        | 3    | 3    |
| Latina                 | I       | 77.47                           | 79.67 | 81.92 | 28                      | 31   | 33   | 3        | 3    | 3    |
| Sassari                | I       | 77.46                           | 79.68 | 81.92 | 26                      | 32   | 34   | 2        | 3    | 3    |
| Mallorca               | E       | 76.33                           | 79.43 | 81.94 | 15                      | 28   | 35   | 2        | 3    | 3    |
| Tarragona <sup>c</sup> | E       | –                               | 80.44 | 82.04 | –                       | –    | 36   | –        | –    | 3    |
| Turin                  | I       | 76.34                           | 79.33 | 82.05 | 16                      | 26   | 37   | 2        | 2    | 3    |
| Modena                 | I       | 77.83                           | 80.17 | 82.14 | 37                      | 38   | 38   | 3        | 3    | 3    |
| Basel                  | CH      | 79.53                           | 80.51 | 82.18 | 52                      | 44   | 39   | 4        | 4    | 3    |
| Varese                 | I       | 77.61                           | 79.78 | 82.20 | 33                      | 33   | 40   | 3        | 3    | 4    |
| Sweden                 | S       | 79.18                           | 80.51 | 82.21 | 50                      | 43   | 41   | 4        | 4    | 4    |
| Veneto                 | I       | 77.64                           | 80.00 | 82.36 | 34                      | 37   | 42   | 3        | 3    | 4    |
| Basque Country         | E       | 77.50                           | 79.98 | 82.38 | 30                      | 36   | 43   | 3        | 3    | 4    |
| Romagna                | I       | 78.70                           | 80.65 | 82.59 | 43                      | 45   | 44   | 4        | 4    | 4    |
| Calvados               | F       | 78.54                           | 80.38 | 82.59 | 41                      | 40   | 45   | 4        | 4    | 4    |
| Parma                  | I       | 78.16                           | 80.17 | 82.59 | 39                      | 39   | 46   | 3        | 3    | 4    |
| Tuscany                | I       | 78.79                           | 80.85 | 82.68 | 45                      | 49   | 47   | 4        | 4    | 4    |
| Macerata               | I       | 78.76                           | 80.81 | 82.68 | 44                      | 48   | 48   | 4        | 4    | 4    |
| Isère                  | F       | 78.81                           | 80.69 | 82.85 | 46                      | 46   | 49   | 4        | 4    | 4    |
| Côte d'Or              | F       | 79.02                           | 80.92 | 83.06 | 47                      | 50   | 50   | 4        | 4    | 4    |
| Geneva                 | CH      | 79.42                           | 81.08 | 83.07 | 51                      | 52   | 51   | 4        | 4    | 4    |
| Navarra                | E       | 78.04                           | 80.76 | 83.07 | 38                      | 47   | 52   | 3        | 4    | 4    |

<sup>a</sup>Mortality data not available before 1991. In 1978 and 1987 we assumed that Portugal CR areas had the same position as in 1997.

<sup>b</sup>Mortality data not available before 1989. In 1978 and 1987 we assumed that the Murcia CR area had the same position as in 1997.

<sup>c</sup>Mortality data not available before 1985. In 1978 we assumed that Tarragona CR area had the same position as in 1997.

A, Austria; CZ, Czech Republic; DK, Denmark; UK for England, Scotland and Wales; EST, Estonia; FIN, Finland; F, France; D, Germany; ICE, Iceland; I, Italy; MLT, Malta; NL, Netherlands; N, Norway; P, Portugal; PL, Poland; SK, Slovakia; SLO, Slovenia; E, Spain; S, Sweden; CH, Switzerland.

an extension of Brass' logit method [8]. It allowed us to estimate the complete life tables for each French registry area and for each year by rescaling the corresponding national life tables according to local mortality in the year 1990.

### Calculating death probabilities

Sometimes, CRs submitted mortality rates instead of death probabilities. In such cases a standard *Exponential* method [9] was used to calculate death probabilities from the mortality rates. This method assumes that survival time is exponential, and that in any one time interval the death rate is constant. If the probability is  $q_x$ , and the mortality rate  $m_x$  for an interval of  $t$  units of time, the relationship is

$$q_x = 1 - e^{-m_x t}$$

### Results

Tables 3 and 4 show LE in 1978, 1987 and 1997 for men and women, respectively, for all registry areas, as determined from submitted or estimated mortality data. These tables rank registry areas (lowest first) according to LE for 1997.

For men, LE ranged from 64.6 to 73.2 years in 1978, and from 64.7 to 77.2 years in 1997. At both ends of the study period, Estonia had the lowest LE. In 1978, Iceland had the highest LE and in 1997, Sweden had the highest LE. The largest increases in LE (>6 years) were in Turin, Veneto (Italy) and Malta (see quartile column, Table 3). The eastern European countries (Estonia, Slovakia, Czech Republic, Poland and Slovenia) consistently had the lowest LEs; Portugal, Scotland, Finland, Denmark and parts of England also had low LEs. Iceland, Sweden and parts of England, Italy, Spain and Switzerland had consistently high LEs. Registry areas in the UK were characterised by marked variation in LE: in 1997, LE was low (72.5 years) in Scotland but high (>76 years) in the South West and East Anglia (England) CR areas.

For women (Table 4), LE ranged from 73.0 years in Malta to 79.5 years in Basel, Switzerland in 1978, and from 76.0 years in Estonia to 83.1 years in Navarra, Spain in 1997. The overall pattern for women was similar to that for men (except that LEs were higher for women), with lowest LEs again in the eastern European countries, Portugal, Scotland and Denmark (but not Finland) and parts of England. LE was consistently high in Sweden (but not Iceland) and parts of France, Italy, Spain and Switzerland (but not England).

Figures 1 and 2 show LE trends over the 20 years of the study period. The median LE is shown together with that for the CR area that, for each year, had the highest, third highest, third lowest and lowest values. These figures illustrate the considerable variation in the lowest LE for both men and women. They also show that the median curves are much closer to the higher curve than the lower one. The differences between the third highest and third lowest curves are wider in 2000 than in 1978 for both men and women. For men, the difference widened from 6.0 to 8.0 years, and for women from 5.2 to 6.3 years. Generally, LEs increased modestly over the study period in countries or areas that had low LE in 1978. For men (Figure 1 and Table 3), LEs increased by  $\leq 3$  years (compared with a median increase of about 3.7 years) in Estonia, Slovakia, Czech Republic, Poland and Denmark. Iceland (which had the highest LE in 1978) and areas of The Netherlands also had

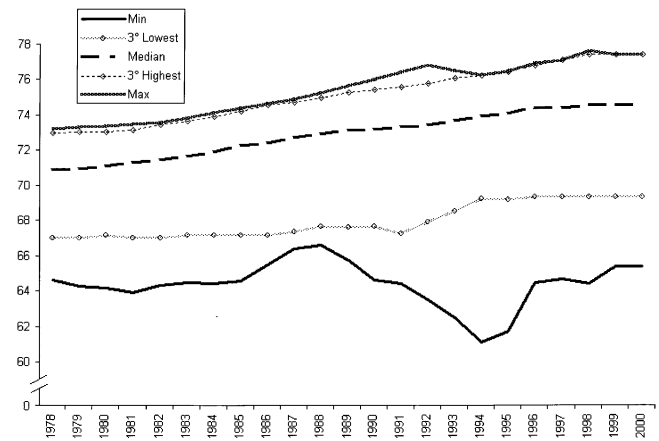

**Figure 1.** Trends in life expectancy at birth for men. The median life expectancy at birth is shown together with that for the cancer registry area that, for each year, had the highest, third highest, third lowest and lowest values.

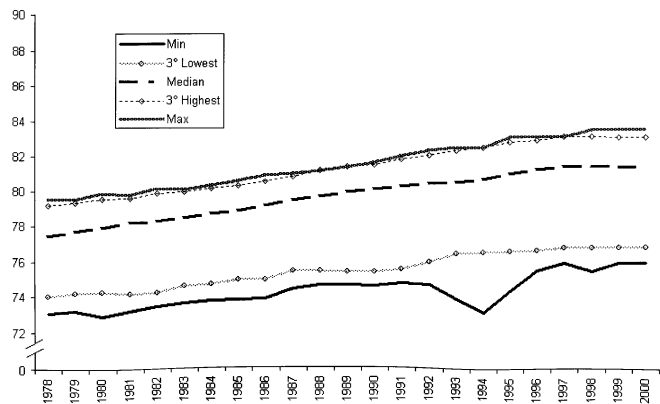

**Figure 2.** Trends in life expectancy at birth for women. The median life expectancy at birth is shown together with that for the cancer registry area that, for each year, had the highest, third highest, third lowest and lowest values.

only small increases. In contrast, LE increases were of the order of 4 or 5 years in almost all the areas which had higher LEs in 1978 (Table 3).

LE changes with time for women were similar to those in men. The eastern European countries (except Slovenia) all had small increases (around 2 years) in LE over the study period; other countries with small increases (around 3 years) were Denmark, Iceland and Norway, parts of England, and parts of The Netherlands. Again, the greatest increases in LE in women were observed in areas which had the highest LEs in 1978: 5.6 years in Mallorca, 5.7 years in Turin and 6.5 years in Malta (quartiles column, Table 4).

Figure 3 shows United Nations (UN) estimates of LE from 1975 to 1999 [10] for countries participating in EURO CARE-3. These figures are presented as 5-year averages to average out random variation. The countries are grouped by colours representing

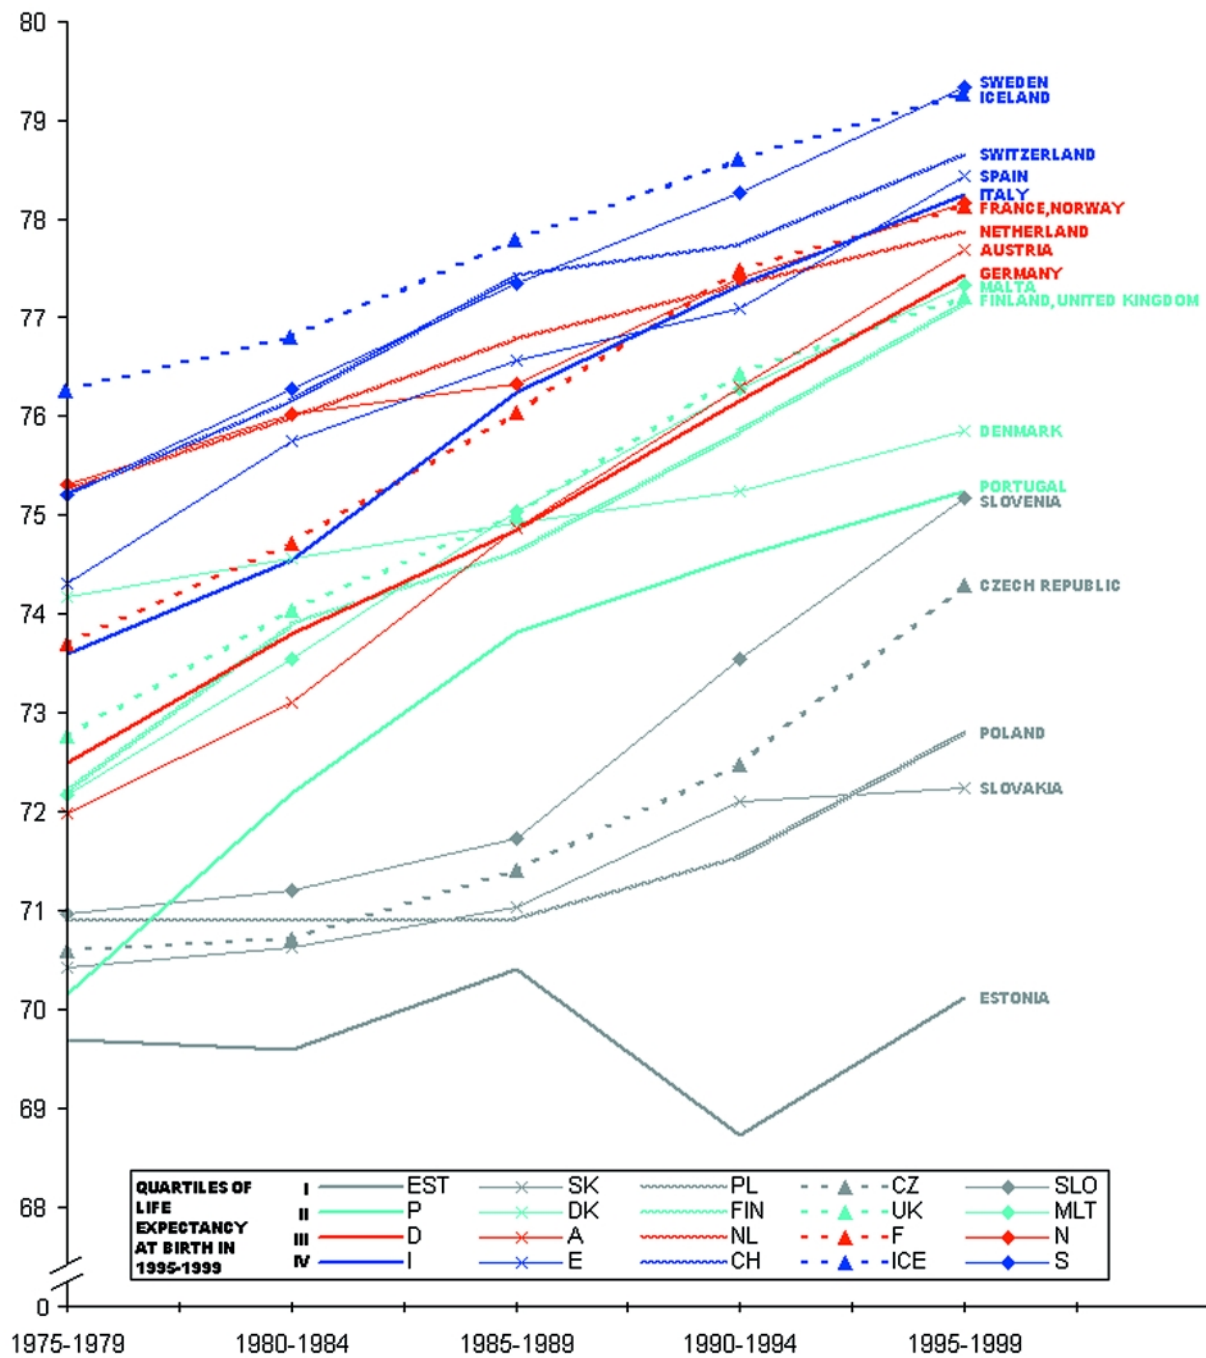

**Figure 3.** Trends in life expectancy in selected EUROCARE-3 countries. Men and women combined, 1975–1999. Source: Population Division of the Department of Economic and Social Affairs of the United Nations Secretariat (2003). World Population Prospects: The 2002 Revision [10]. A, Austria; CZ, Czech Republic; DK, Denmark; UK for England, Scotland and Wales; EST, Estonia; FIN, Finland; F, France; D, Germany; ICE, Iceland; I, Italy; MLT, Malta; NL, Netherlands; N, Norway; P, Portugal; PL, Poland; SK, Slovakia; SLO, Slovenia; E, Spain; S, Sweden; CH, Switzerland.

quartiles of the LE distribution in the period 1995–1999. All five eastern European countries were in the lowest quartile (grey); the LE of Estonia did not increase over the period, while the LEs of the other four eastern European countries changed little up to 1985–1989 and by 1.5–2.5 years thereafter. Countries in the second lowest quartile are represented in turquoise. Among these, the LE of Portugal increased—mostly in the earlier part of the

period—by about 5 years. In the same group, the LEs for Malta, Finland and the UK increased by similar amounts as Portugal, while the LE increase for Denmark was the smallest of all countries except Estonia. LEs for countries in the second highest quartile (red) were in the narrow range 77 to 78 years in the period 1995–1999, while in 1975–1979 the range was much wider. LEs in Austria and Germany increased by around 5 years from the

72 years of 1975–1979. Among the countries with the highest LEs (blue), those for Iceland, Sweden and Switzerland were consistently high throughout the period, while that for Italy and Spain increased most (>4 years).

Relationships between LE and major economic indicators are shown in Table 5 and Figure 4. GDP, total national expenditure on health (TNEH) and total public expenditure on health (TPEH) were estimated at the country level after cost-of-living adjustments [13–15]. Overall LE were strongly and significantly correlated with GDP (Pearson  $r = 0.85$ ,  $P < 0.001$ ), and with both TNEH ( $r = 0.83$ ,  $P < 0.001$ ) and TPEH ( $r = 0.82$ ,  $P < 0.001$ ) (Table 5). LE increased directly with GDP for the eastern European countries (Figure 4). In contrast, Malta and Spain had high LEs in relation to their GDP, while the relationship between LE and GDP for countries with GDPs over 20 000 \$PPP was weak (right hand side of Figure 4). In this group, Denmark had a lower LE than expected.

Table 5 shows median values of macro-economic indicators for country groups defined by quartiles of the LE distribution taken from OECD and UN publications. All three indicators were low for countries belonging to the lowest LE quartile. The median GDP and TPEH presented an increasing trend through all the quartiles of LE.

We analysed the relation of our own LE data to 5-year relative survival [12] for selected cancers. Table 6 shows median 5-year relative survival for these cancers by country groups defined by quartiles of LE distribution. For all the cancer sites considered, the lowest relative survival was in the lowest LE quartile. The correlation between LE and survival was not particularly strong for lung cancer ( $r = 0.38$ ,  $P < 0.01$ ) or Hodgkin's disease ( $r = 0.40$ ;  $P < 0.01$ ), and non-existent for pancreatic cancer ( $r = 0.02$ ,  $P = 0.92$ ). In contrast, the correlation was strong for colorectal cancer ( $r = 0.71$ ;  $P < 0.001$ ) and all cancers combined ( $r = 0.71$ ,  $P < 0.001$ ).

## Discussion

EUROCARE-3 is a large study designed to reliably compare population-based cancer survival across different countries and areas of Europe. Life tables are essential for estimating relative survival, the indicator used to compare cancer survival, correcting mortality due to causes other than the considered cancer. We systematically constructed life tables for each CR area, applying various approaches to estimate complete mortality data (and hence life expectancy at birth) from the often incomplete data provided by the CRs.

The general time and regional trends in LE provided by our estimates (Figures 1 and 2) are closely similar to those published by the UN at the country level (Figure 3). In particular, the eastern European countries had low LE, while Iceland, Italy, Spain, Sweden and Switzerland had high LE. During the 20-year EURO-CARE study period, LEs increased considerably in most European countries except those in eastern Europe and Denmark (Tables 3 and 4). For the eastern European countries, the stasis may be related to the rapid social and economic changes that occurred following the dissolution of the USSR. However, it is not clear why LE in Denmark did not increase as much as in other western European countries. Our analysis uncovered a wide range in LE across

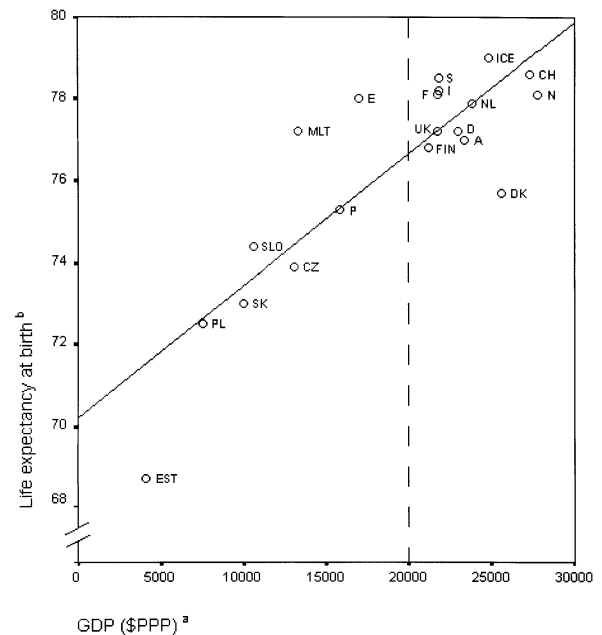

**Figure 4.** Life expectancy at birth and gross domestic product (GDP) by country, 1997. <sup>a</sup>Gross domestic product from OECD Health Data 2002 [13] and from Human Development Report 1999 [11] for Malta, Estonia and Slovenia. \$PPP, parity purchasing power per capita (US\$). <sup>b</sup>Life expectancy at birth (male plus female) (years) from Human Development Report 1999 [11]. A, Austria; CZ, Czech Republic; DK, Denmark; UK for England, Scotland and Wales; EST, Estonia; FIN, Finland; F, France; D, Germany; ICE, Iceland; I, Italy; MLT, Malta; NL, The Netherlands; N, Norway; P, Portugal; PL, Poland; SK, Slovakia; SLO, Slovenia; E, Spain; S, Sweden; CH, Switzerland.

European countries (Figure 3), and also considerable within-country variation in some cases (Tables 3 and 4; Figures 1 and 2). In particular, there was wide variation in LE across the seven CR areas of England, Wales and Scotland (Tables 3 and 4). This finding indicates that, in order to produce accurate relative survival figures, it is necessary to work with accurate local life tables. In fact, if not accounted for by use of local area-specific LE data, large differences in general mortality can severely confound comparisons of relative survival [2].

We found that LE was strongly associated with GDP (Figure 4), TPEH and TNEH (Table 5). However, detailed examination of the data revealed a complicated pattern and that, among the richest countries, relations between LE and both GDP and TPEH were no longer straightforward, suggesting the need for further investigation.

We also found that LE was strongly associated with 5-year relative survival for all cancers combined (Table 6). However, for lung cancer, Hodgkin's disease and pancreatic cancer, the relationship between LE and survival was weak or non-existent (Table 6). This could reflect differences in treating these cancers, which may not be closely related to economic development or general health expenditure. Almost all patients with pancreatic cancer, for instance, die quickly from their disease, and between-country survival differences, often due to differences in the accuracy of diagnosis or follow-up, are small and not related to LE.

**Table 5.** Life expectancy at birth in 1997 and median values (range) of macro-economic indicators

| Quartile | Country         | Life expectancy, 1997 <sup>a</sup> | Median value per quartile (\$PPP), 1997                |                                                         |                                                         |
|----------|-----------------|------------------------------------|--------------------------------------------------------|---------------------------------------------------------|---------------------------------------------------------|
|          |                 |                                    | GDP <sup>b</sup><br><i>r</i> = 0.85 ( <i>P</i> <0.001) | TNEH <sup>c</sup><br><i>r</i> = 0.83 ( <i>P</i> <0.001) | TPEH <sup>d</sup><br><i>r</i> = 0.82 ( <i>P</i> <0.001) |
| I        | Estonia         | 68.7                               | 10 281                                                 | 677                                                     | 639                                                     |
|          | Poland          | 72.5                               | (4062–15 814)                                          | (243–1360)                                              | (207–881)                                               |
|          | Slovakia        | 73.0                               |                                                        |                                                         |                                                         |
|          | Czech Republic  | 73.9                               |                                                        |                                                         |                                                         |
|          | Slovenia        | 74.4                               |                                                        |                                                         |                                                         |
|          | Portugal        | 75.3                               |                                                        |                                                         |                                                         |
| II       | Denmark         | 75.7                               | 22 408                                                 | 1873                                                    | 1328                                                    |
|          | Finland         | 76.8                               | (13 316–25 610)                                        | (1481–2465)                                             | (1180–1856)                                             |
|          | Austria         | 77.0                               |                                                        |                                                         |                                                         |
|          | Malta           | 77.2                               |                                                        |                                                         |                                                         |
|          | United Kingdom  | 77.2                               |                                                        |                                                         |                                                         |
|          | Germany         | 77.2                               |                                                        |                                                         |                                                         |
| III      | The Netherlands | 77.9                               | 22 822                                                 | 2002                                                    | 1443                                                    |
|          | Spain           | 78.0                               | (17 026–27 759)                                        | (1294–2193)                                             | (920–1849)                                              |
|          | France          | 78.1                               |                                                        |                                                         |                                                         |
|          | Norway          | 78.1                               |                                                        |                                                         |                                                         |
| IV       | Italy           | 78.2                               | 23 360                                                 | 1879                                                    | 1530                                                    |
|          | Sweden          | 78.5                               | (21 852–27 317)                                        | (1684–2841)                                             | (1216–1664)                                             |
|          | Switzerland     | 78.6                               |                                                        |                                                         |                                                         |
|          | Iceland         | 79.0                               |                                                        |                                                         |                                                         |

<sup>a</sup>Life expectancy at birth (male plus female) (years) from Human Development Report 1999 [11].

<sup>b</sup>GDP from OECD Health Data 2002 [13] and Human Development Report 1999 [11] (for Malta, Estonia and Slovenia).

<sup>c</sup>TNEH from OECD Health Data 2002 [13] and Human Development Report 2002 [14] (for Estonia and Slovenia; data for Malta not available).

<sup>d</sup>TPEH from OECD Health Data 2002 [13] and Human Development Report 2000 [15] (for Estonia and Slovenia; data for Malta not available).

GDP, gross domestic product; \$PPP, parity purchasing power per capita (US\$); TNEH, total national expenditure on health; TPEH, total public expenditure on health.

## Acknowledgements

The authors thank Don Ward for help with the English, and Emily Taussig and Samba Sowe for secretarial assistance. This research was supported by the Foundation Compagnia di San Paolo, Turin, Italy and EUROCARE Biomed-2 programme.

Members of the EUROCARE Group involved in the preparation of life tables are as follows: Austria: Tyrol, W. Oberaigner (Cancer Registry of Tyrol); Czech Republic: West Bohemia, J. Holub, M. Jechova (Institute of Health Information and Statistics of Czech Republic); Denmark: H. Storm, G. Engholm (Danish Cancer Society, Institute of Cancer Epidemiology); Estonia, T. Aareleid (Estonian Cancer Registry); Finland: T. Hakulinen, B. Soderman (Finnish Cancer Registry); France: P. Grosclaude (Tarn Cancer Registry); Germany: C. Spix (German Registry of Childhood Malignancies); Saarland: H. Ziegler (Saarland Cancer Registry); Iceland: E. Olafsdottir (Icelandic Cancer Registry); Italy: R. Capocaccia (National Institute of Health, Rome);

A. Micheli, P. Baili, E. Mugno (Istituto Nazionale per lo Studio e la Cura dei Tumori, Milan); Malta: M. Dalmás (Malta National Cancer Registry); Norway: S. E. Tysvaer (Cancer Registry of Norway); Portugal: P. Pinheiro (RORSUL Cancer Registry); Poland: Cracow, J. Rachtan (Cracow Cancer Registry); Warsaw, M. Bielska-Lasota (Warsaw Cancer Registry); Slovakia: I. Plesko (National Cancer Registry of Slovakia); Slovenia: V. Pompe-Kirn (Cancer Registry of Slovenia); Spain: Basque Country, I. Izarzugaza (Basque Country Cancer Registry); Granada, C. Martinez-Garcia (Granada Cancer Registry); Mallorca, I. Garau (Mallorca Cancer Registry); Murcia, C. Navarro, L. Cirera (Murcia Cancer Registry); Navarra, E. Ardanaz, C. Moreno (Navarra Cancer Registry); Tarragona, J. Galceran (Tarragona Cancer Registry); Sweden: L. Barlow (Swedish National Tumour Registry); Switzerland: Basel, P. Pury (Association of Swiss Cancer Registries); Geneva, M. Usel (Geneva Cancer Registry); The Netherlands: Amsterdam, O. Visser (Amsterdam Cancer Registry); Eindhoven, J.W.W. Coebergh, L. Van der Heijden (Eindhoven

**Table 6.** Life expectancy at birth (in quartiles) and relative survival (maximum and minimum values in parenthesis) for selected cancers from EUROCARE-3. *R* correlation coefficient between life expectancy and relative survival

| Quartile | Cancer registry <sup>a</sup> | Country | Life expectancy 1997 <sup>b</sup> | Five-year relative survival <sup>c</sup> , men and women combined |                                                             |                                                            |                                                            |                                                      |
|----------|------------------------------|---------|-----------------------------------|-------------------------------------------------------------------|-------------------------------------------------------------|------------------------------------------------------------|------------------------------------------------------------|------------------------------------------------------|
|          |                              |         |                                   | All cancers combined<br><i>r</i> = 0.71<br>( <i>P</i> < 0.001)    | Colorectal cancer<br><i>r</i> = 0.71<br>( <i>P</i> < 0.001) | Hodgkin's disease<br><i>r</i> = 0.40<br>( <i>P</i> < 0.01) | Pancreatic cancer<br><i>r</i> = 0.02<br>( <i>P</i> = 0.92) | Lung cancer<br><i>r</i> = 0.38<br>( <i>P</i> < 0.01) |
| I        | Estonia                      | EST     | 70.74                             | 39.2<br>(30.0–51.1)                                               | 37.8<br>(25.1–53.1)                                         | 74.9<br>(62.0–85.3)                                        | 3.3<br>(1.9–6.4)                                           | 8.0<br>(6.2–12.3)                                    |
|          | Slovakia                     | SK      | 72.85                             |                                                                   |                                                             |                                                            |                                                            |                                                      |
|          | West Bohemia                 | CZ      | 73.41                             |                                                                   |                                                             |                                                            |                                                            |                                                      |
|          | Cracow                       | PL      | 74.16                             |                                                                   |                                                             |                                                            |                                                            |                                                      |
|          | Warsaw                       | PL      | 74.34                             |                                                                   |                                                             |                                                            |                                                            |                                                      |
|          | Slovenia                     | SLO     | 75.03                             |                                                                   |                                                             |                                                            |                                                            |                                                      |
|          | Scotland                     | UK      | 75.31                             |                                                                   |                                                             |                                                            |                                                            |                                                      |
|          | Denmark                      | DK      | 76.05                             |                                                                   |                                                             |                                                            |                                                            |                                                      |
|          | Mersey                       | UK      | 76.09                             |                                                                   |                                                             |                                                            |                                                            |                                                      |
|          | Saarland                     | D       | 76.50                             |                                                                   |                                                             |                                                            |                                                            |                                                      |
| II       | Yorkshire                    | UK      | 76.69                             | 49.1<br>(37.8–53.8)                                               | 52.7<br>(39.1–60.3)                                         | 81.1<br>(70.5–88.4)                                        | 4.3<br>(1.9–8.7)                                           | 9.4<br>(5.9–15.7)                                    |
|          | Wales                        | UK      | 76.84                             |                                                                   |                                                             |                                                            |                                                            |                                                      |
|          | Finland                      | FIN     | 76.94                             |                                                                   |                                                             |                                                            |                                                            |                                                      |
|          | West Midlands                | UK      | 77.07                             |                                                                   |                                                             |                                                            |                                                            |                                                      |
|          | Eindhoven                    | NL      | 77.16                             |                                                                   |                                                             |                                                            |                                                            |                                                      |
|          | Trent                        | UK      | 77.16                             |                                                                   |                                                             |                                                            |                                                            |                                                      |
|          | Bas Rhin                     | F       | 77.60                             |                                                                   |                                                             |                                                            |                                                            |                                                      |
|          | Thames                       | UK      | 78.02                             |                                                                   |                                                             |                                                            |                                                            |                                                      |
|          | Mallorca                     | E       | 78.11                             |                                                                   |                                                             |                                                            |                                                            |                                                      |
|          | Norway                       | N       | 78.23                             |                                                                   |                                                             |                                                            |                                                            |                                                      |
| III      | Amsterdam                    | NL      | 78.29                             | 47.3<br>(40.5–58.6)                                               | 51.3<br>(41.9–60.4)                                         | 80.1<br>(68.6–87.9)                                        | 4.2<br>(1.0–11.7)                                          | 10.0<br>(5.4–17.0)                                   |
|          | Ferrara                      | I       | 78.33                             |                                                                   |                                                             |                                                            |                                                            |                                                      |
|          | Basque Country               | E       | 78.34                             |                                                                   |                                                             |                                                            |                                                            |                                                      |
|          | Calvados                     | F       | 78.36                             |                                                                   |                                                             |                                                            |                                                            |                                                      |
|          | East Anglia                  | UK      | 78.39                             |                                                                   |                                                             |                                                            |                                                            |                                                      |
|          | Oxford                       | UK      | 78.39                             |                                                                   |                                                             |                                                            |                                                            |                                                      |
|          | South West                   | UK      | 78.41                             |                                                                   |                                                             |                                                            |                                                            |                                                      |
|          | Tyrol                        | A       | 78.54                             |                                                                   |                                                             |                                                            |                                                            |                                                      |
|          | Ragusa                       | I       | 78.62                             |                                                                   |                                                             |                                                            |                                                            |                                                      |
|          | Genoa                        | I       | 78.62                             |                                                                   |                                                             |                                                            |                                                            |                                                      |
| IV       | Sassari                      | I       | 78.73                             | 48.4<br>(45.4–54.3)                                               | 51.4<br>(49.6–57.7)                                         | 79.7<br>(62.3–90.0)                                        | 4.3<br>(2.7–5.6)                                           | 10.8<br>(7.8–14.4)                                   |
|          | Iceland                      | ICE     | 78.83                             |                                                                   |                                                             |                                                            |                                                            |                                                      |
|          | Latina                       | I       | 78.85                             |                                                                   |                                                             |                                                            |                                                            |                                                      |
|          | Varese                       | I       | 78.89                             |                                                                   |                                                             |                                                            |                                                            |                                                      |
|          | Modena                       | I       | 79.03                             |                                                                   |                                                             |                                                            |                                                            |                                                      |
|          | Veneto                       | I       | 79.03                             |                                                                   |                                                             |                                                            |                                                            |                                                      |
|          | Turin                        | I       | 79.05                             |                                                                   |                                                             |                                                            |                                                            |                                                      |
|          | Parma                        | I       | 79.19                             |                                                                   |                                                             |                                                            |                                                            |                                                      |
|          | Tarragona                    | E       | 79.31                             |                                                                   |                                                             |                                                            |                                                            |                                                      |
|          | Navarra                      | E       | 79.53                             |                                                                   |                                                             |                                                            |                                                            |                                                      |
| Romagna  | I                            | 79.71   |                                   |                                                                   |                                                             |                                                            |                                                            |                                                      |
| Sweden   | S                            | 79.72   |                                   |                                                                   |                                                             |                                                            |                                                            |                                                      |
| Macerata | I                            | 79.96   |                                   |                                                                   |                                                             |                                                            |                                                            |                                                      |
| Tuscany  | I                            | 79.99   |                                   |                                                                   |                                                             |                                                            |                                                            |                                                      |
| Geneva   | CH                           | 80.23   |                                   |                                                                   |                                                             |                                                            |                                                            |                                                      |

<sup>a</sup>Because of missing data for one or more cancer sites, cancer registries of Basel (CH), Côte d'Or (F), Granada (E), Isère (F), Malta (MLT), Munich (D), Murcia (E) and Portugal (PT) are not included.

<sup>b</sup>Life expectancy at birth (men and women combined).

<sup>c</sup>Median of the distribution of the 5-year cancer relative survival in each quartile of the distribution of life expectancy at birth (minimum and maximum value in parentheses).

A, Austria; CZ, Czech Republic; DK, Denmark; UK for England, Scotland and Wales; EST, Estonia; FIN, Finland; F, France; D, Germany; ICE, Iceland; I, Italy; NL, Netherlands; N, Norway; PL, Poland; SK, Slovakia; SLO, Slovenia; E, Spain; S, Sweden; CH, Switzerland.

Cancer Registry); UK: Scotland, L. Bhatti (Scottish Cancer Intelligence Unit); England and Wales, M.J. Quinn, P. Babb (Office for National Statistics).

## References

1. Verdecchia A, Capocaccia R, Santaquilani M, Hakulinen T. Methods of survival data analysis and presentation issues. In Berrino F, Capocaccia R, Estève J et al.: *Survival of Cancer Patients in Europe: the EURO CARE-2 Study*. IARC Scientific Populations No. 151. Lyon, France: IARC 1999; 41–61.
2. Micheli A, De Angelis G, Giorgi Rossi A, Capocaccia R. General mortality and the survival of cancer patients in Europe. In Berrino F, Capocaccia R, Estève J et al.: *Survival of Cancer Patients in Europe: the EURO CARE-2 Study*. IARC Scientific Populations No. 151. Lyon, France: IARC 1999; 63–71.
3. Capocaccia R, Gatta G, Roazzi P et al. and the EURO CARE Working Group. The EURO CARE-3 database: methodology of data collection, standardisation, quality control and statistical analysis. *Ann Oncol* 2003; 14 (Suppl 5): v14–v27.
4. Micheli A, Gatta G, Verdecchia A. Studying survival of cancer patients in different populations: its potential and role. In Verdecchia A, Micheli A, Gatta G et al.: *Survival of Cancer Patients in Italy. The ITACARE study*. *Tumori* 1997; 83: 3–8.
5. Elandt-Johnson RC, Johnson NL. *Survival models and data analysis*. 1980; 111–115.
6. Ewbank DC, Gomez de Leon JC, Stoto MA. A reducible four-parameter system of model life-tables. *Population Studies* 1983; 37: 105–127.
7. Bonarini F. *Appunti di demografia (Parte I)*. 1995; 58–77.
8. Brass W. On the scale of mortality. In Brass W. (ed.): *Biological Aspects of Demography*. London, UK: Taylor and Francis 1971.
9. Kleinbaum DG, Kupper LL, Morgenstern H. *Epidemiol Research*. 1982; 97–116.
10. Population Division of the Department of Economic and Social Affairs of the United Nations Secretariat (2003). *World Population Prospects: The 2002 Revision*. [online] <http://esa.un.org/unpp> (3 November 2003, date last accessed). New York, NY: United Nations 2003.
11. United Nations Development Programme. *Human Development Report 1999*. [online] <http://hdr.undp.org/reports/global/1999/en/> (3 November 2003, date last accessed). New York, NY: Oxford University Press 1999.
12. Sant M, Aareleid T, Berrino F et al. and the EURO CARE Working Group. EURO CARE-3: survival of cancer patients diagnosed 1990–94—results and commentary. *Ann Oncol* 2003; 14 (Suppl 5): v61–v118.
13. Organisation for Economic Co-operation and Development (OECD). *OECD Health Data 2002, 4th edition*. Paris, France: OECD 2002.
14. United Nations Development Programme. *Human Development Report 2002: Deepening Democracy in a Fragmented World*. [online] <http://hdr.undp.org/reports/global/2002/en/default.cfm> (3 November 2003, date last accessed). New York, NY: Oxford University Press 2002.
15. United Nations Development Programme. *Human Development Report 2000*. [online] <http://hdr.undp.org/reports/global/2000/en/> (3 November 2003, date last accessed). New York, NY: Oxford University Press 2000.
